# Supplementary material for: Intersecting Methane Production and Oxidation Zones in Freshwater Sediments
Source: Copernicus journal article supplement (doi:10.5194/bg-2020-330), 2020-10-08
Supplement: Supplementary file 1 [file bg-2020-330-supplement.pdf]

## Supplementary information

### Intersecting Methane Production and Oxidation Zones in Freshwater Sediments

Xueping Chen<sup>a</sup>, Juan Yu<sup>a</sup>, Lihua Liu<sup>b,\*</sup>, Jing Sun<sup>a</sup>, Fayan Bai<sup>a</sup>, Ming Yang<sup>a</sup>, Zheng  
Chen<sup>c</sup>, Chiquan He<sup>a</sup>, Xiaoyan Liu<sup>a</sup>, Shuang Bai<sup>a</sup>, Fushun Wang<sup>a,\*</sup>

<sup>a</sup>School of Environmental and Chemical Engineering, Shanghai University, 99  
Shangda Road, Shanghai 200444, China

<sup>b</sup>Guangzhou Institute of Energy Conversion, Chinese Academy of Sciences,  
Guangzhou 510640, China

<sup>c</sup>Department of Health and Environmental Sciences, Xi'an Jiaotong-Liverpool  
University, Suzhou, Jiangsu 215123, China

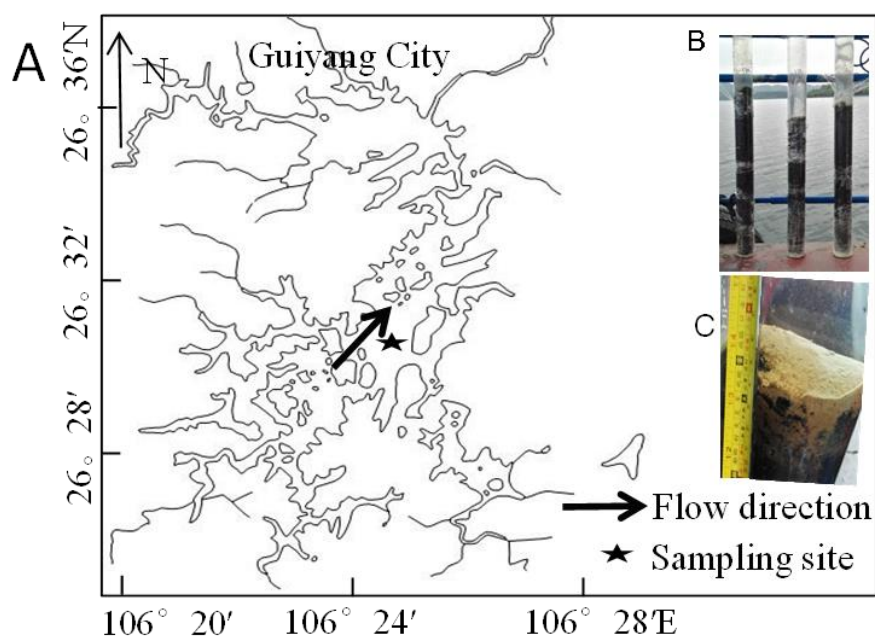

**Fig. S1** Location of the Hongfeng Reservoir and the sampling site (A) and the sediment columns (B). In winter, there is brownish plaque (iron oxide) on the surface of sediment cores (~1cm) (C).

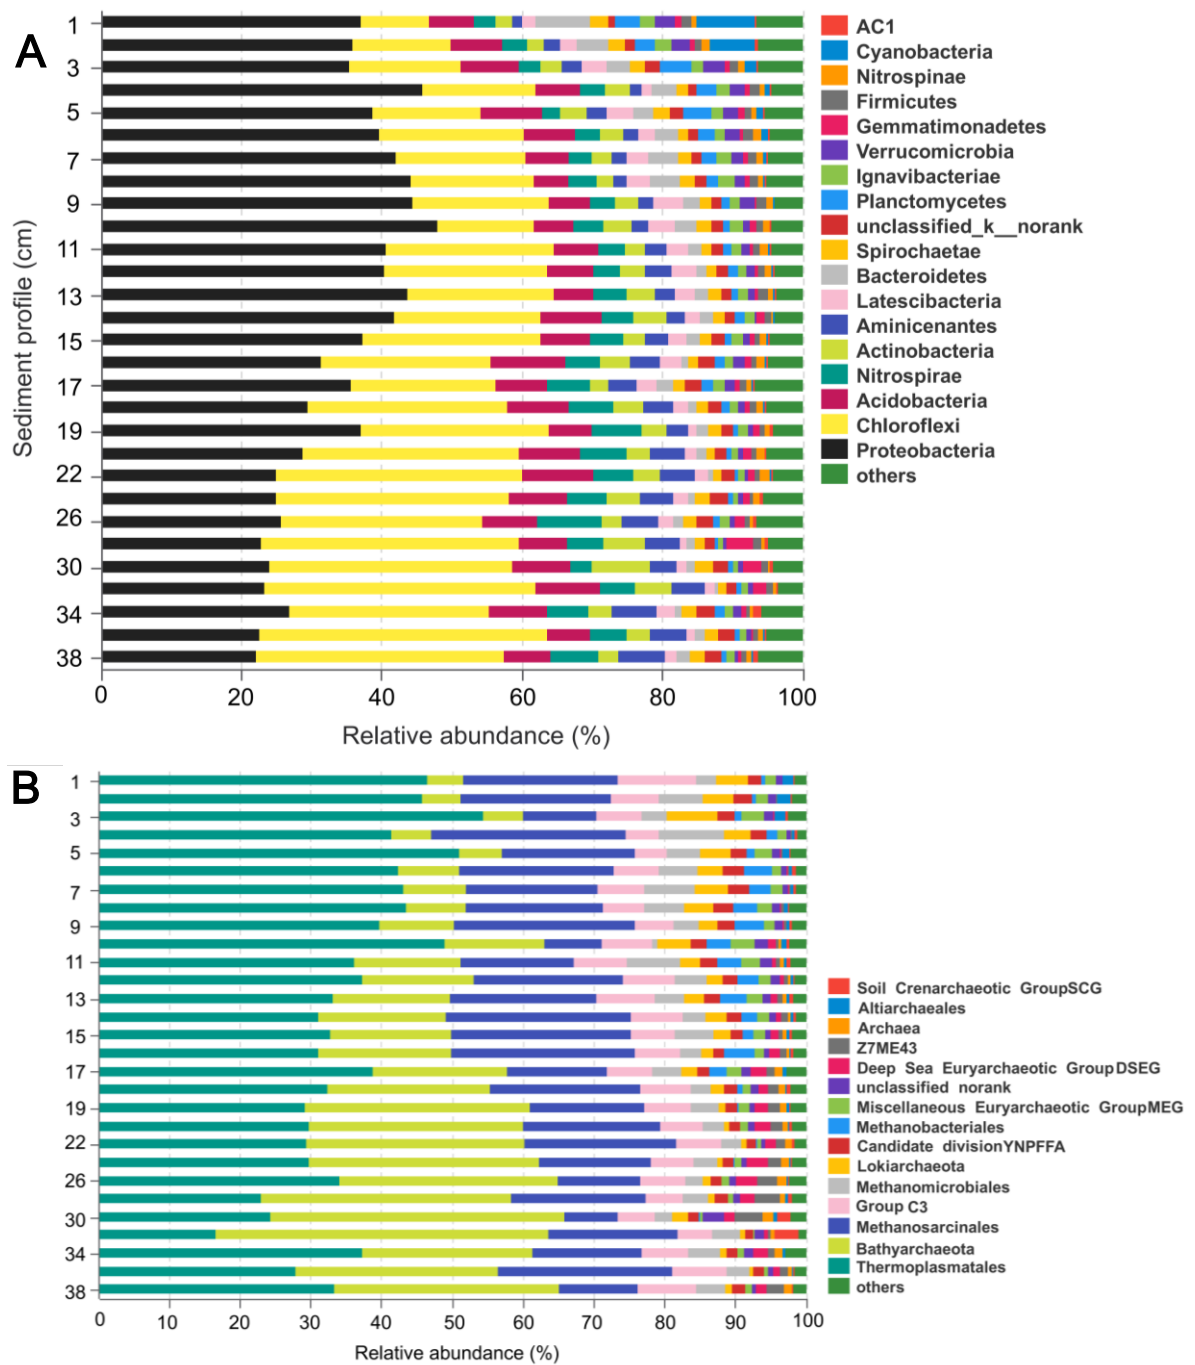

**Fig. S2** The community composition of bacteria (A) and archaea (B) at phylum and order levels, respectively.

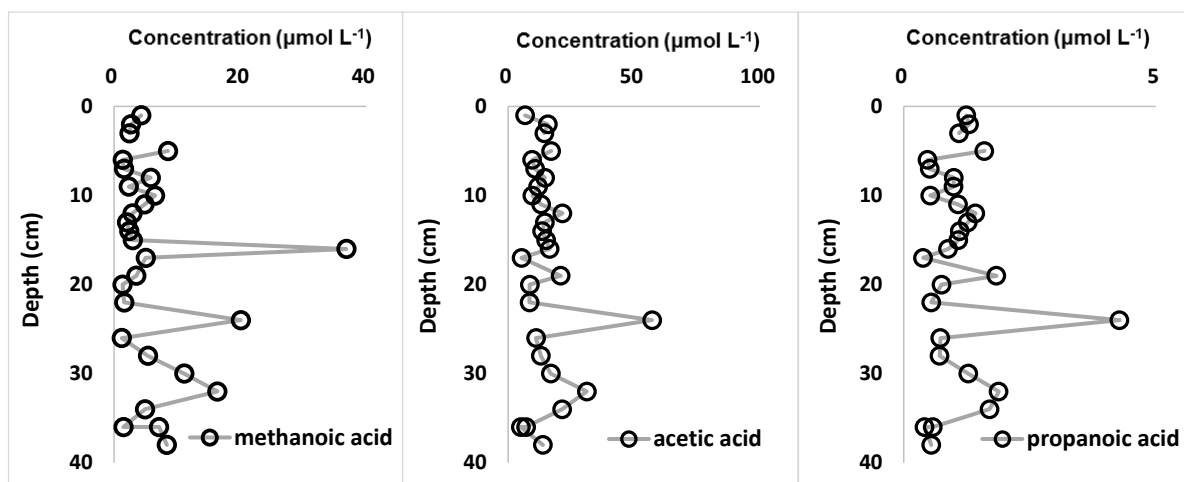

**Fig. S3** The concentration of methanoic acid, acetic acid, and propanoic acid along the sediment profile in the Hongfeng Reservoir
